# Supplementary material for: Exceptional loss in ozone in the Arctic winter/spring of 2019/2020
Source: Copernicus journal article supplement (doi:10.5194/acp-21-14019-2021), 2021-09-21
Supplement: Supplementary file 1 [file acp-21-14019-2021-supplement.pdf]

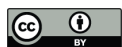

*Supplement of*

## **Exceptional loss in ozone in the Arctic winter/spring of 2019/2020**

**Jayanarayanan Kuttippurath et al.**

*Correspondence to:* Jayanarayanan Kuttippurath ([jayan@coral.iitkgp.ac.in](mailto:jayan@coral.iitkgp.ac.in))

The copyright of individual parts of the supplement might differ from the article licence.

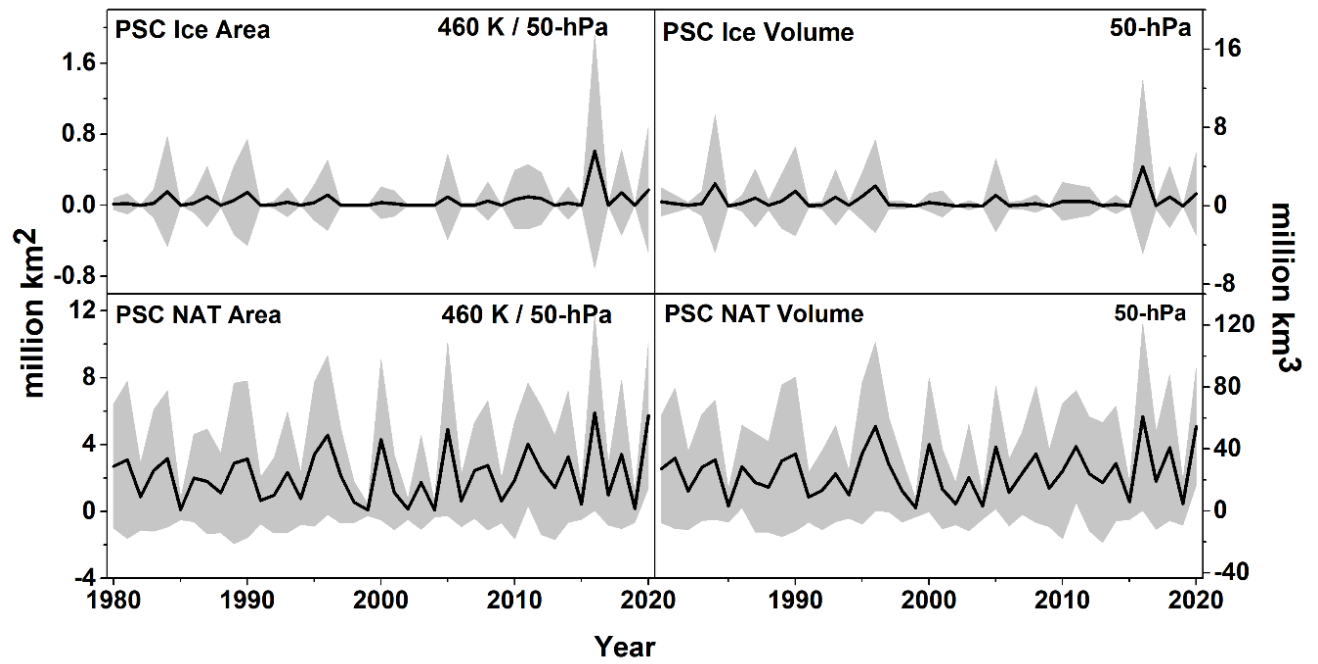

**Figure S1:** The temporal evolution of area of PSC and volume of PSC in the Arctic winters from 1979 to 2020, as estimated using the MERRA-2 data. The shaded area is the standard deviation from the mean.

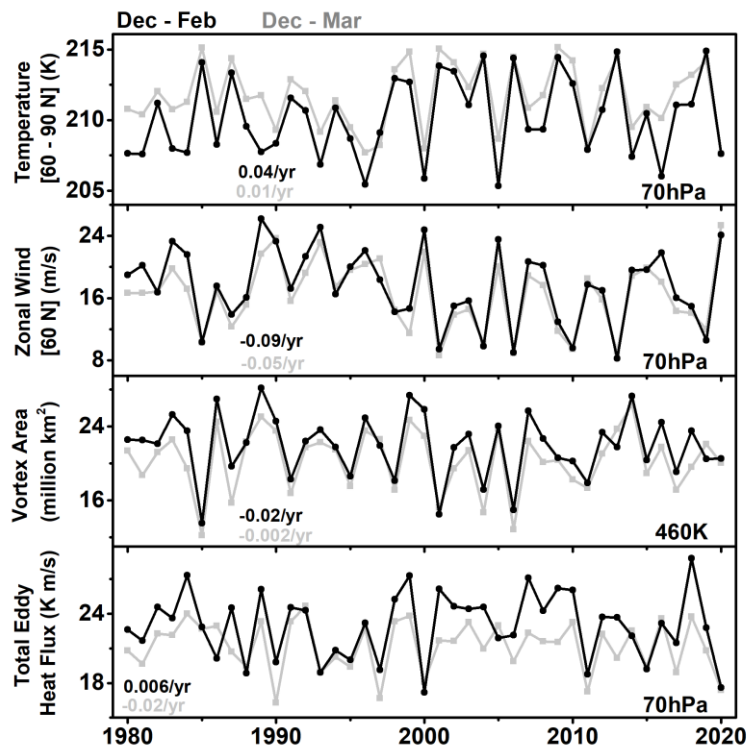

**Figure S1b:** The temporal evolution of temperature, zonal winds, vortex area, and heat flux in the Arctic winters from 1979 to 2020, as estimated using the MERRA-2 data.

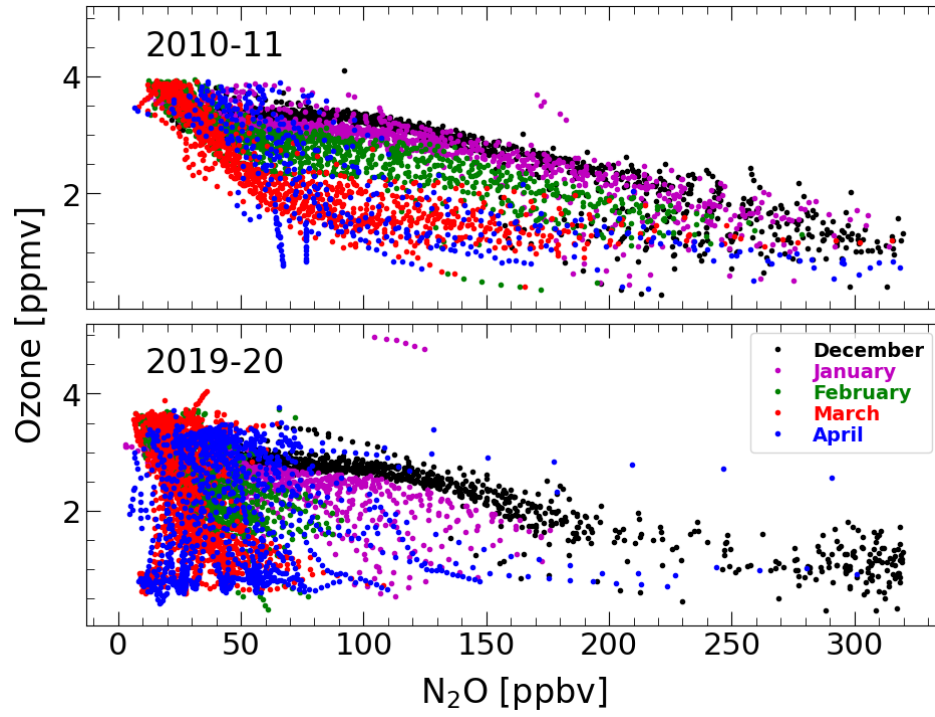

**Figure S2:** The time evolution correlation between ozone and N<sub>2</sub>O in the Arctic winter 2020. The measurements selected inside the vortex.

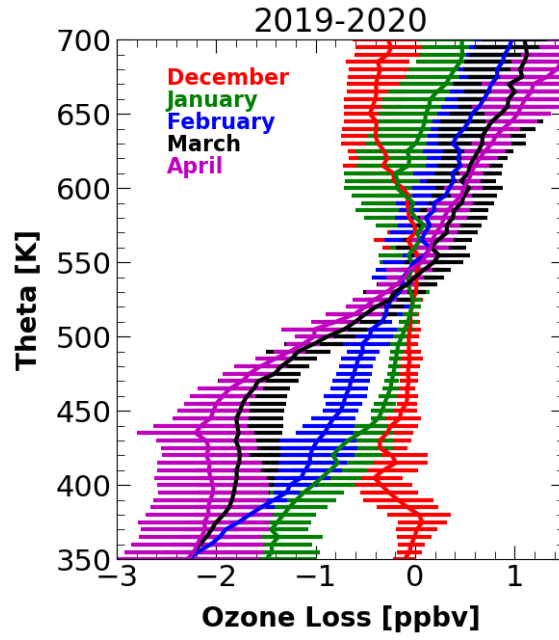

**Figure S3:** The monthly averaged ozone loss and the standard deviation (horizontal bars) computed using the tracer descent method.

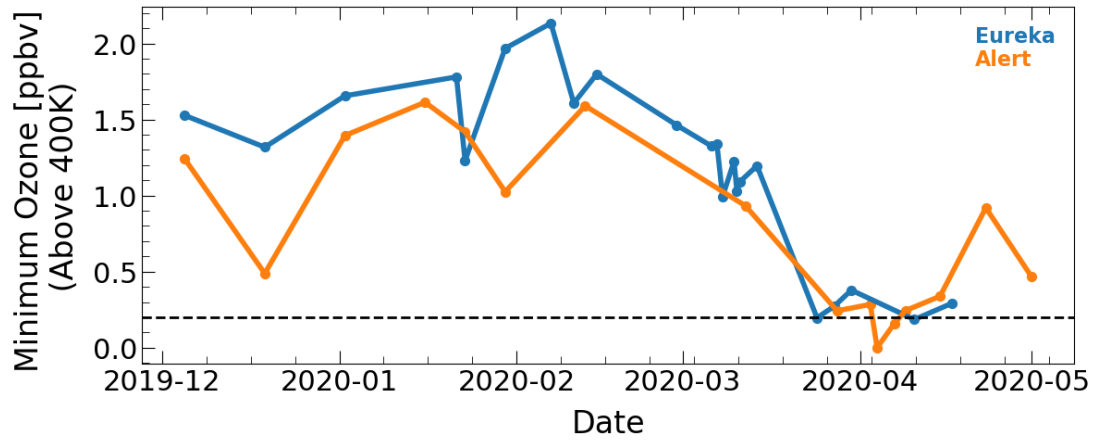

**Figure S4:** The temporal evolution stratospheric ozone as observed by the ozonesonde at Eureka and Alert stations.

**Table 1: OZONE HOLE DAYS (TCO LESS THAN 220 DU ANYWHERE IN THE VORTEX REGION) OBSERVED IN DIFFERENT DATASETS**

**OMPS (24 Days)**

- Dec 01 – 05 (5 Days)
- Jan 01 – 02 (2 Days)
- Jan 23, 25 – 30 (7 Days)
- Mar 05, 12 – 19, 28 (10 Days)

**MERRA-2 (19 Days)**

- Dec 01 – 05 (5 Days)
- Jan 25 – 26 (2 Days)
- Mar 05, 12, 17 – 22 (8 Days)
- Apr 06 – 07 (2 Days)
